# Supplementary material
Source: Springer Nature journal article supplement (https://www.springermedizin.de/resource/supplementary/13256_2013_2643_MOESM4_ESM.pdf/9650174)
Supplement: MOESM4 [file 9650174]

PATIENT 4

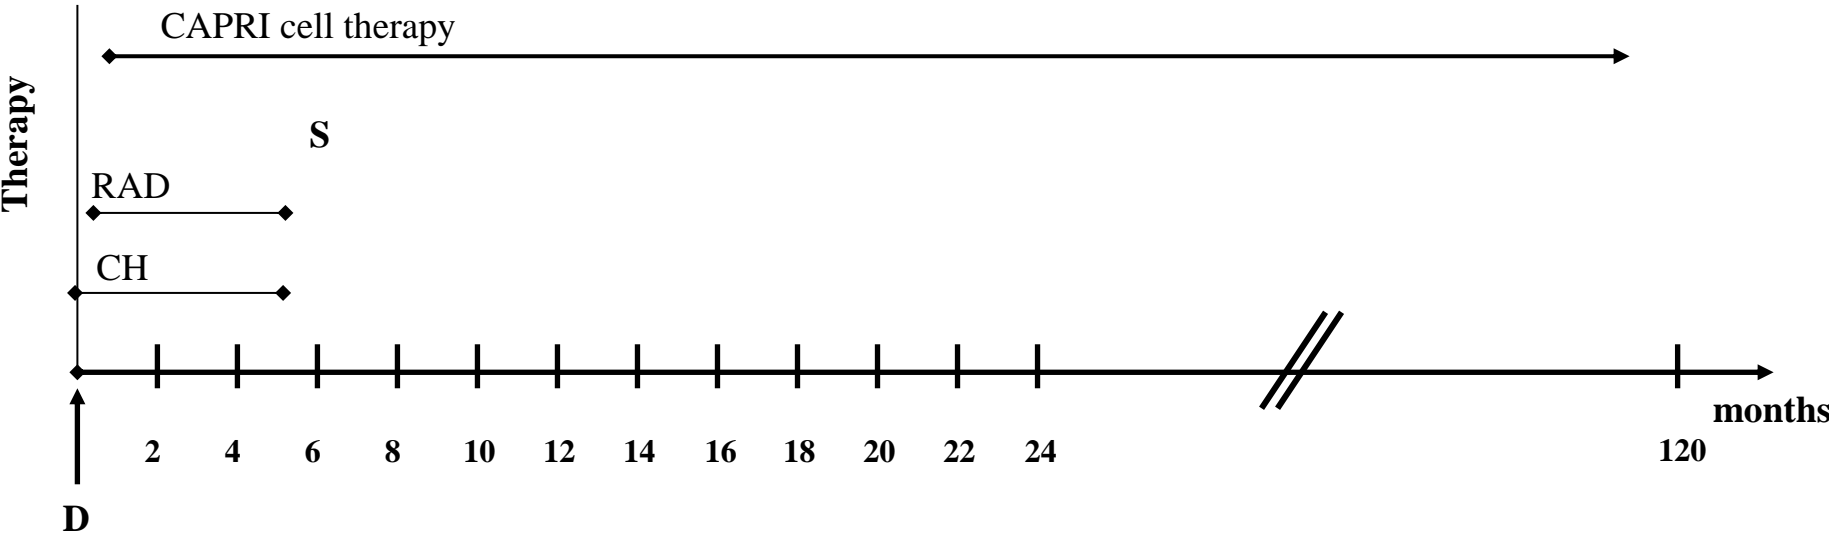

D = day of diagnosis  
CH = chemotherapy: cisplatin  
RAD = radiation: 70Gy  
S = surgery: upper lobe, first rib, clavicle, part of the pleura
